# Supplementary material for: Local and sex-specific biases in crossover vs. noncrossover outcomes at meiotic recombination hot spots in mice
Source: PubMed Central journal article supplement — Genes Dev. 2015 Aug 15;29(16):1721–33. doi: 10.1101/gad.265561.115 (PMC4561481; doi:10.1101/gad.265561.115), 2015-08-15
Supplement: supp_gad.265561.115_SuppMaterial.pdf [file supp_gad.265561.115_SuppMaterial.pdf]

## Local and sex-specific biases in crossover vs. noncrossover outcomes at meiotic recombination hotspots in mouse

Esther de Boer, Maria Jasin, and Scott Keeney

### List of Supplemental Material

Supplemental text describing the use of recombinant inbred mouse strains for recombination hotspot identification.

Figure S1. Breeding scheme for generating recombinant-inbred strains.

\*\* Table S1: Polymorphisms, oligonucleotides, and recombinants at the central hotspot.

\*\* Table S2: Polymorphisms, oligonucleotides, and recombinants at the distal hotspot.

Table S3: Additional primers for amplification and sequencing of the central hotspot region.

Table S4: Additional primers for amplification and sequencing of the distal hotspot region.

Table S5: Compilation of recombination and DSB (SSDS read count) data for the hotspots shown in Figure 3B.

\*\* Provided as separate Excel files.

### Identification of hotspots using recombinant inbred (RI) mouse strains

To compare recombination in male and female meiosis, we set out to identify two hotspots, preferentially on the same chromosome: one hotspot in a chromosomal region where males showed a clear preference for crossover formation over females, and one hotspot in a chromosomal region where males and females showed similar levels of crossover formation. At the time these studies were initiated, direct maps of DSBs via SSDS mapping were not yet available, so we initially made use of a method previously described by Bois (Bois, 2007) in which RI mouse strains are used as a crossover library (Figure S1) for prospective hotspot identification.

Based on cytological analysis using MLH1 foci as a marker for crossover formation, male mice form crossovers preferentially in the centromere-distal subtelomeric regions of many chromosomes (Baker *et al.*, 1996; Froenicke *et al.*, 2002). In contrast, females show much less of a preference for crossing over in this region (de Boer *et al.*, 2006). Using these cytological data, we selected the following centromere-distal subtelomeric regions as having a male-specific crossover preference: 90–100% of chromosomes 1 and 2, 75–90% of chromosome 18 and 70–90% of chromosome 19 (with the centromere set at 0%). We further defined the following central regions as having no clear sex-specific preference for crossing over: 40–60% for chromosomes 1, 2 and 19; and 45–65% for chromosome 18.

Using SNP data from various RI panels (Shifman *et al.*, 2006), sites where a crossover had occurred during RI inbreeding can be easily identified. We used strains from five RI lines: BxD (C57BL/6J x DBA; 34 strains), BxA and AxB (C57BL/6J x A/J and vice versa; 18 and 22 strains, respectively), BxH (C57BL/6J x C3H/HeJ; 16 strains) and CxB (BALB/cByJ x C57BL/6J; 13 strains) to identify crossover breakpoints located in the chromosomal regions of interest. In all RI lines, one of the parents was C57BL/6J because the cytological data were from mice of this background (de Boer *et al.*, 2006).

To select hotspot candidates for further analysis, we took into account the number of occurrences of crossovers in different RI lines, presence of reciprocal recombinant configurations in different lines, and the number of known SNPs in the region. For each target chromosomal region, we selected two RI crossover breakpoints (16 in total; see table below). The selected breakpoints mapped to very large regions, ranging from ~70 kb to ~850 kb, so we used the mouse phenome database from Jackson labs (<http://phenome.jax.org>) to locate SNPs at various positions within the CO breakpoint region. Short stretches surrounding the SNPs (typically ~1 kb) were amplified from genomic DNA (purchased from the Jackson Laboratories) from both parental strains as well as from the RI strains involved. SNPs were subsequently

genotyped by sequencing. This was repeated until a ~10 kb region containing the crossover breakpoint remained, which we then sequenced.

Despite an initial group of 16 crossover breakpoints as possible hotspots, we were only able to use one in this study because most hotspot candidates did not meet the requirements for analysis. Since the conversion tracts that are associated with noncrossovers are short, a high SNP density within the hotspot is required for the detection of noncrossovers. In addition, sufficient SNPs located outside but nearby (within ~5 kb) are required for the allele-specific PCR needed in both the crossover and noncrossover/crossover assays. Finally, because both assays are PCR-based, it is important to have few repeat elements surrounding the hotspot. As many as 13 candidate breakpoints had to be discarded because they failed to meet one or more of these criteria (see table below). Thus, while the crossover library in RI strains may be useful for prospective hotspot identification in some circumstances (Bois, 2007), its overall success rate in identifying hotspots suitable for molecular assays is too low to make it a viable alternative to more direct DSB mapping via SSDS or SPO11-oligo sequencing.

## References

Baker, S. M., *et al.* (1996). "Involvement of mouse Mlh1 in DNA mismatch repair and meiotic crossing over." Nat Genet **13**(3): 336-342.

Bois, P. R. J. (2007). "A highly polymorphic meiotic recombination mouse hot spot exhibits incomplete repair." Mol.Cell.Biol. **27**(20): 7053-7062.

Cole, F., *et al.* (2010). "Comprehensive, fine-scale dissection of homologous recombination outcomes at a hot spot in mouse meiosis." Molecular Cell **39**(5): 700-710.

de Boer, E., *et al.* (2006). "Two levels of interference in mouse meiotic recombination." Proc Natl Acad Sci USA **103**(25): 9607-9612.

Froenicke, L., *et al.* (2002). "Male mouse recombination maps for each autosome identified by chromosome painting." Am.J.Hum.Genet. **71**(6): 1353-1368.

Kauppi, L., *et al.* (2004). "Where the crossovers are: recombination distributions in mammals." Nat.Rev.Genet. **5**(6): 413-424.

Shifman, S., *et al.* (2006). "A high-resolution single nucleotide polymorphism genetic map of the mouse genome." PLoS Biol **4**(12): e395.

## Analyzed crossover breakpoints from RI strains.

| Breakpoint | Chrom. | Region  | Initial breakpoint from RI strains |                                  |                             |                            | Results of refined breakpoint mapping |                         |                             |                             | Comment                                                                                     |
|------------|--------|---------|------------------------------------|----------------------------------|-----------------------------|----------------------------|---------------------------------------|-------------------------|-----------------------------|-----------------------------|---------------------------------------------------------------------------------------------|
|            |        |         | Initial size breakpoint            | RI strains                       | Located between             |                            | Narrowed down to                      | RI strains              | Located between             |                             |                                                                                             |
|            |        |         |                                    |                                  | SNP (position)              | ... and SNP (position)     |                                       |                         | SNP (position)              | ... and SNP (position)      |                                                                                             |
| BP1_2      | 1      | central | ~372 kb                            | AxB8<br>BxA13                    | rs6182343<br>(78,315,951)   | rs13475939<br>(78,687,715) | ~0.2 kb                               | BxA13                   | rs6292825<br>(78,590,768)   | Indel<br>(78,590,953)       | used in this study.                                                                         |
|            |        |         |                                    |                                  |                             |                            | ~11 kb                                | AxB8                    | rs30859973<br>(78,605,548)  | rs30663826<br>(78,616,144)  | discarded; many repeats, low SNP density.                                                   |
| BP1_6      | 1      | central | ~433 kb                            | AxB21<br>AxB23<br>BxD18<br>BxD31 | rs6234856<br>(87,916,394)   | rs13475970<br>(88,349,770) | ~217 kb                               | AxB21<br>AxB23<br>BxD18 | rs30301268<br>(88,133,257)  | rs13475970<br>(88,349,770)  |                                                                                             |
|            |        |         |                                    |                                  |                             |                            | ~17 kb                                | BxD31                   | rs30305484<br>(88,080,647)  | rs31323177<br>(88,097,782)  |                                                                                             |
| BP1_21     | 1      | distal  | ~272 kb                            | CxB6<br>AxB15                    | rs13476283<br>(184,905,583) | rs6154379<br>(185,177,962) | ~0.5 kb                               | AxB15                   | rs33827280<br>(185,015,170) | rs33827277<br>(185,015,554) | discarded; low SNP density, repeats in region surrounding the breakpoint.                   |
|            |        |         |                                    |                                  |                             |                            | ~19 kb                                | CxB6                    | rs33830201<br>(185,145,767) | rs33827771<br>(185,164,928) | discarded, no known SNPs in ~19 kb region between parental strains involved                 |
| BP1_30     | 1      | distal  | ~158 kb                            | BxD13                            | rs3708442<br>(192,343,890)  | rs3689947<br>(192,501,995) | ~13 kb                                | BxD13                   | rs33062268<br>(192,421,794) | rs32103256<br>(192,435,216) |                                                                                             |
| BP2_2      | 2      | central | ~847 kb                            | BxA26                            | rs13476594<br>(79,768,919)  | rs3722345<br>(80,615,688)  | ~34 kb                                | BxA26                   | rs28315693<br>(80,242,258)  | rs28302339<br>(80,276,369)  | discarded; low SNP density in ~34 kb region.                                                |
| BP2_8      | 2      | central | ~513 kb                            | BxA26<br>AxB2                    | rs13476687<br>(106,727,593) | rs6242654<br>(107,240,990) | ~0.5 kb                               | BxA26                   | rs28330238<br>(106,751,765) | rs28330235<br>(106,752,168) | discarded; CO breakpoint in 403 bp SNP-free region, surrounding region also low SNP density |
|            |        |         |                                    |                                  |                             |                            | ~36 kb                                | AxB2                    | rs27492383<br>(107,049,776) | rs27492209<br>(107,085,355) |                                                                                             |

de Boer, Jasin & Keeney

|         |    |         |         |                         |                             |                            |         |                       |                             |                             |                                                                                              |
|---------|----|---------|---------|-------------------------|-----------------------------|----------------------------|---------|-----------------------|-----------------------------|-----------------------------|----------------------------------------------------------------------------------------------|
| BP2_12  | 2  | distal  | ~111 kb | BxA7<br>BxD22<br>BxD9   | rs3726974<br>(169,841,980)  | rs3143843<br>(169,952,882) | ~5 kb   | BxA7<br>BxD22<br>BxD9 | rs27628756<br>(169,886,635) | rs27628737<br>(169,891,409) | discarded; CO<br>breakpoints in<br>4774 bp SNP-free<br>region                                |
| BP2_16  | 2  | distal  | ~71 kb  | BxD22<br>BxD5           | rs13476936<br>(179,208,083) | rs6335805<br>(179,278,998) | ~6 kb   | BxD22<br>BxD5         | rs52534685<br>(179,250,964) | rs27683534<br>(179,257,053) | discarded; CO<br>breakpoint in ~6.1<br>kb region without<br>SNPs between<br>parental strains |
| BP18_2  | 18 | central | ~231 kb | AxB8                    | rs3676196<br>(42,923,810)   | rs13483328<br>(43,154,669) | ~17 kb  | AxB8                  | rs29578559<br>(43,097,768)  | rs31900117<br>(43,115,130)  | discarded; low<br>SNP density in<br>~17.4 kb region.                                         |
| BP18_11 | 18 | central | ~132 kb | BxD31                   | rs13483381<br>(58,263,501)  | rs13483382<br>(58,395,122) | ~13 kb  | BxD31                 | rs30260734<br>(58,372,106)  | rs30205618<br>(58,384,987)  | discarded; low<br>SNP density and<br>multiple repeats in<br>~13 kb region.                   |
| BP18_13 | 18 | distal  | ~374 kb | AxB2<br>BxA26           | rs13483437<br>(73,844,689)  | rs13483438<br>(74,218,827) | ~77 kb  | BxA26                 | rs13483437<br>(73,844,689)  | rs38325583<br>(73,921,549)  |                                                                                              |
|         |    |         |         |                         |                             |                            | ~86 kb  | AxB2                  | rs37541434<br>(73,923,173)  | rs29556648<br>(74,008,689)  |                                                                                              |
| BP18_16 | 18 | distal  | ~412 kb | BxD13<br>BxD27          | rs13483436<br>(73,432,362)  | rs13483437<br>(73,844,689) | ~204 kb | BxD13<br>BxD27        | rs13483436<br>(73,432,362)  | rs6377427<br>(73,637,771)   |                                                                                              |
| BP19_2  | 19 | central | ~483 kb | AxB21                   | rs6291559<br>(27,573,224)   | rs6238322<br>(28,056,254)  | ~36 kb  | AxB21                 | rs36294339<br>(27,597,466)  | rs38490227<br>(27,633,343)  | discarded; low<br>SNP density and<br>multiple repeats in<br>~36 kb region.                   |
| BP19_10 | 19 | central | ~137 kb | AxB5<br>AxB13           | rs3710829<br>(38,168,496)   | rs13483617<br>(38,305,197) | ~137 kb | AxB5<br>AxB13         | rs3710829<br>(38,168,496)   | rs13483617<br>(38,305,197)  | trouble with SNP<br>typing because of<br>repeats                                             |
| BP19_13 | 19 | distal  | ~139 kb | AxB2<br>CxB5            | rs8257607<br>(47,864,318)   | rs13483653<br>(48,003,548) | ~5 kb   | AxB2<br>CxB5          | rs30668843<br>(47,958,306)  | rs31272779<br>(47,963,411)  | discarded; low<br>SNP density at<br>and surrounding<br>the CO breakpoint                     |
| BP19_15 | 19 | distal  | ~236 kb | BxA26<br>BxD36<br>BxD21 | rs3023496<br>(48,137,866)   | rs3660360<br>(48,373,875)  | ~13 kb  | BxA26<br>BxD21        | rs31222821<br>(48,314,544)  | rs49222411<br>(48,327,789)  | discarded; CO<br>breakpoint in ~13<br>kb region without<br>SNPs                              |
|         |    |         |         |                         |                             |                            | ~21 kb  | BxD36                 | rs30851180<br>(48,211,635)  | rs39432548<br>(48,232,486)  | discarded; low<br>SNP density and<br>multiple repeats in<br>~21 kb region.                   |

**Table S3A. Hotspot in the central region of chromosome 1: primers used for amplification and sequencing**

| Primer          | Sequence                      |
|-----------------|-------------------------------|
| SNP1 BP1 2 for1 | TTTGCTGGTTTATTGCTGGGTC        |
| SNP1 BP1 2 rev1 | AGCACACAAAGAAGCTCCAAATCC      |
| SNP2 BP1 2 for1 | ATGCTTAGAAGCCAGCTGTATGTG      |
| SNP2 BP1 2 rev1 | TGCAGCGATCATCCACTCAG          |
| BP1 2c for 1    | CCCAGAACAATGTCAATCAGC         |
| BP1 2c rev 1    | CTTTTGAAGGTAGCTTTGCGG         |
| BP1 2c for2     | TCTGCCCTGAAGAGTTTTGAGC        |
| BP1 2c rev2     | AGGGTTTCTGGCCTGTCATTG         |
| BP1 2e for1     | GTACGCAATACAGTGGAGACAGGAG     |
| BP1 2e rev1     | TGTGACAATAATGGCAGCAGGAG       |
| BP1 2f for1     | GATGCCAGCTTCTCCGACCTT         |
| BP1 2f rev1     | TATGAAGGGAAGAGAAAGGCAACC      |
| BP1 2i for1     | TCTTCCCTGGCTACAACCTTCAA       |
| BP1 2i rev1     | TGCAAGGATGAGAGTGACAGAGG       |
| BP1 2j for1     | GATGCCAACAACCTATGACTGCTC      |
| BP1 2j rev1     | AGTGTGCTCTCAATGCCAAATCTC      |
| BP1 2jc for1    | ATGGCCTTCCTTCAAATCTTCCT       |
| BP1 2jc for2    | AAGAAATTAAGGGCTGGCAAGAT       |
| BP1 2jc for3    | TAGAAAGGCAGCAGGGTCACAA        |
| BP1 2jc for4    | CCCAGAACGTATTTCCACCCAA        |
| BP1 2jc for5    | TCCTCCCAGAACAATGTCAATCAG      |
| BP1 2jc for6    | GTGATGCTAAGGGGTGAAGAAGAC      |
| BP1 2jc rev1    | AGATGGCACAGAACACAAATAATGG     |
| BP1 2jc rev2    | TCAGCACTGGGTACTTTCTCTTTT      |
| BP1 2jc rev3    | TGGAATGCTGGCTTAAATGAAATC      |
| BP1 2jc rev4    | CACCCCTTAGCATCACATCTTCAT      |
| BP1 2jc rev5    | CCGTGTGATGTGATGTCCAGTATT      |
| BP1 2jc rev6    | CTAGAGGCAATAAATCTTTCCACATC    |
| BP1 2jc rev7    | GTATGTACTTTGAGGCAGGATGTCTAC   |
| BP1 2jc rev8    | CTGTATTGTTAGGCTTGATTTATGTGTCT |
| BP1 2jc rev9    | GGGGCAGCAACTCCTTTTCAG         |
| BP1 2jc for7    | CTCACTCCTCACATGAACAATGCT      |
| BP1 2jc for8    | AGGCCTTATTAATGCTGCTACTGC      |
| BP1 2jc for9    | CCTTCCCCCTTCATCAATGC          |
| BP1 2jc for10   | GACAGCTCCCTTCTCCTCCTCT        |
| BP1 2jc for11   | GCCAGTAAGATGAGTCAGCAGGTA      |
| BP1 2jc for12   | GAGAACTCTTCTAGCCAGAGCATTG     |
| BP1 2jc for13   | GATGGGGTTTTCTCAGTTGGGTT       |
| BP1 2jc for14   | GACAAACCAGCCACCCTCACTT        |
| BP1 2jc for15   | GCTGCCATGCCTGAAGACTC          |

**Table S3B. Hotspot in the central region of chromosome 1: Universal PCR primers.**

| Primer              | Sequence                 |
|---------------------|--------------------------|
| BP1 2jc 3467749F1 U | AAGCCTGATCATGGTGACACAGGC |
| BP1 2jc for4        | CCCAGAACGTATTTCCACCCAA   |
| BP1 2jc rev14       | CTAATGGCAGATGCTTCCGTTTTG |
| BP1 2jc rev2        | TCAGCACTGGGTACTTTCTCTTTT |

**Table S4A. Hotspot in the distal region of chromosome 1: primers used for amplification and sequencing.**

| Primer         | Sequence                 |
|----------------|--------------------------|
| seqG1_1761814F | ATCCCTAATTCTTGCCCCTACTT  |
| seqG1_1762630F | GTGTCCGGTGTGGTCTATCTTGAA |
| seqG1_1763061F | AAATCCAGACGAACCCAGAGAAGG |
| seqG1_1763869F | CGATAATTCATTCAGACTTCAGGA |
| seqG1_1764109F | GGATTCAAGGGGAGCCATTTACA  |
| seqG1_1764427F | AGTAGGGCTGTTTCTGGGTATTG  |
| seqG1_1764850F | GGCAGAACACCCTAACACCCTACA |
| seqG1_1764960R | CCAGCAGAGGCCAAGGACT      |
| seqG1_1764390R | AGGCCTCACTTCCCACACTATT   |

**Table S4B. Hotspot in the distal region of chromosome 1: Universal PCR primers.**

| Primer      | Sequence                 |
|-------------|--------------------------|
| 1761560F1_U | GCAAAAAGTGTAGTCGGGCATAAC |
| 1760576F1_U | TTTGTGCATCATTAGCTCAGGTCT |
| 1765562R1_U | CAGAATCATCGAGACGTTTGCTAA |
| 1766602R1_U | CTCAAGCTCCCAAGGTCTATCTAC |

**Table S5. Hotspot compilation used in Figure 3B**

| Hotspot      | Chrom. | Start     | End       | Interval size | SSDS hotspot start* | SSDS hotspot end* | DSB activity (SSDS count)* | CO frequency (cM) | F1 hybrid assayed for CO | CO freq. source** | Notes                                                              |
|--------------|--------|-----------|-----------|---------------|---------------------|-------------------|----------------------------|-------------------|--------------------------|-------------------|--------------------------------------------------------------------|
| HS14.9       | 19     | 14954681  | 14961578  | 6897          | 14957522            | 14959522          | 1066                       | 0.0052            | BxD                      | 1,2               | Similar initiation frequency inferred on both alleles              |
| HS18.2       | 19     | 18219446  | 18224030  | 4584          | 18220397            | 18222397          | 123                        | 0.0135            | BxD                      | 1,2               | Reciprocal CO asymmetry, predicts DBA allele hotter than B6 allele |
| HS23.9       | 19     | 23913421  | 23918537  | 5116          | 23916042            | 23918042          | 180                        | 0.0027            | BxD                      | 1,2               | Reciprocal CO asymmetry, predicts DBA allele hotter than B6 allele |
| HS44.2       | 19     | 44222000  | 44228101  | 6101          | 44222189            | 44224189          | 3610                       | 0.024             | BxD                      | 1,2               | Insufficient data to evaluate symmetry                             |
| HS48.3       | 19     | 48285649  | 48290677  | 5028          | 48288465            | 48290465          | 311                        | 0.0015            | BxD                      | 1,2               | Similar initiation frequency inferred on both alleles              |
| HS61.1       | 19     | 61085324  | 61090636  | 5312          | 61087502            | 61089502          | 738                        | 0.0506            | BxD                      | 1,2               | Similar initiation frequency inferred on both alleles              |
| HS61.2       | 19     | 61226601  | 61232402  | 5801          | 61228218            | 61230218          | 2178                       | 0.0578            | BxD                      | 1,2               | Similar initiation frequency inferred on both alleles              |
| A3           | 1      | 161954686 | 161956666 | 1981          | 161954749           | 161956749         | 1984                       | 0.26              | BxD                      | 3                 | Similar initiation frequency inferred on both alleles              |
| M1           | 1      | 145721107 | 145726510 | 5403          | 145723315           | 145725315         | 79                         | 0.005             | BxC                      | 4                 | Similar initiation frequency inferred on both alleles              |
| Ebeta        | 17     | 34446742  | 34452746  | 6004          | 34449044            | 34451044          | 167                        | 0.02              | B10xA?                   | 5                 | Similar initiation frequency inferred on both alleles              |
| central      | 1      | 78585902  | 78588950  | 3048          | 78586497            | 78588497          | 2814                       | 0.92              | AxB                      | This study        | Similar initiation frequency inferred on both alleles              |
| subtelomeric | 1      | 187089370 | 187093372 | 4002          | 187090129           | 187092832         | 9247                       | 0.42              | AxB                      | This study        | Similar initiation frequency inferred on both alleles              |

de Boer, Jasin & Keeney

|       |    |          |          |      |          |          |      |        |     |     |                                                                    |
|-------|----|----------|----------|------|----------|----------|------|--------|-----|-----|--------------------------------------------------------------------|
| Scnm1 | 3  | 95521800 | 95525145 | 3345 | 95521294 | 95523294 | 300  | 0.1105 | BxC | 6   | Pedigree data: 85 cM/Mb in 1.3 kb hotspot                          |
| HS9   | 19 | 10741609 | 10745069 | 3461 | 10743299 | 10745299 | 2117 | 0.0477 | BxD | 2   | Insufficient data to evaluate symmetry                             |
| HS22  | 19 | 23033612 | 23038358 | 4747 | 23035147 | 23037147 | 329  | 0.0217 | BxD | 1,2 | Reciprocal CO asymmetry, predicts B6 allele hotter than DBA allele |
| HS37  | 19 | 38747388 | 38755916 | 8529 | 38751793 | 38753793 | 1084 | 0.0345 | BxD | 2   | Insufficient data to evaluate symmetry                             |

---

All coordinates are NCBI Build 37

\*SSDS hotspot coordinates and strength are from Brick et al. (2012).

\*\*References:

1. Wu et al. (2010).
2. Bois (2007).
3. Cole et al. (2010).
4. Kauppi et al. (2007).
5. Yauk et al. (2003).
6. Buchner et al. (2002).



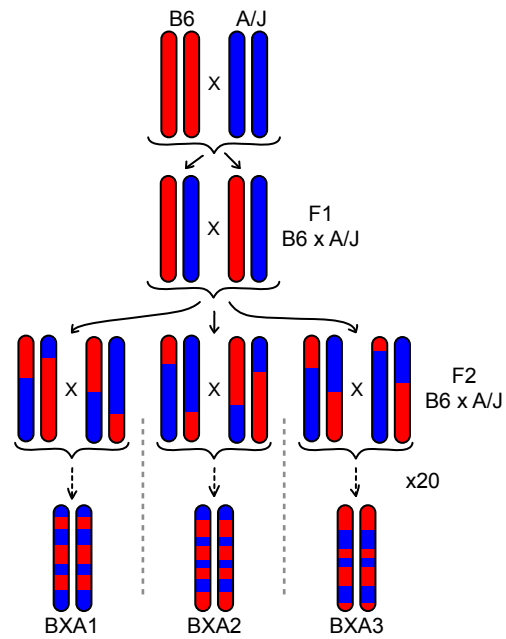

**Figure S1.** Breeding scheme for generating recombinant-inbred strains. RI strains are named using abbreviations for the maternal and paternal progenitor strains. Each RI strain can be viewed as a library of crossovers that occurred during the generations of inbreeding prior to fixation of homozygosity. Adapted from Bois (2007).
